# Supplementary material
Source: Springer Nature journal article supplement (https://www.springermedizin.de/resource/supplementary/12906_2011_440_MOESM3_ESM.pdf/9519794)

**A**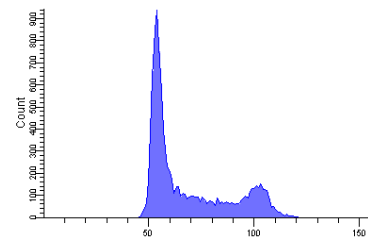0  $\mu\text{M}$  WA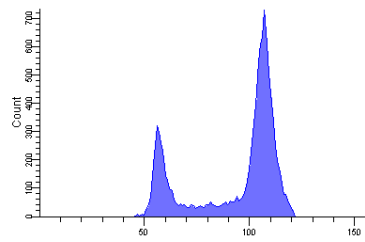0.5  $\mu\text{M}$  WA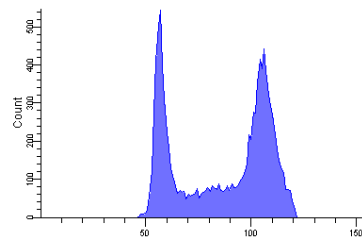1  $\mu\text{M}$  WA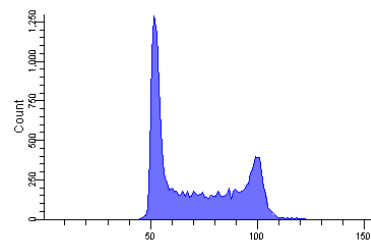2.5  $\mu\text{M}$  WA**B**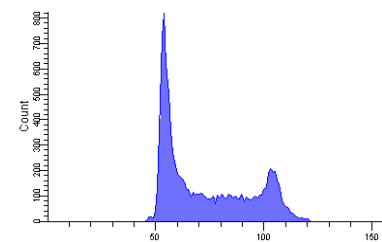

0 h

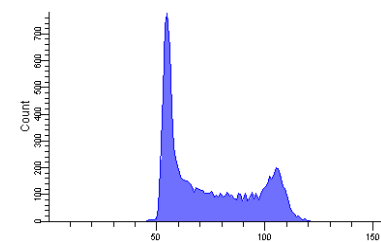

6 h

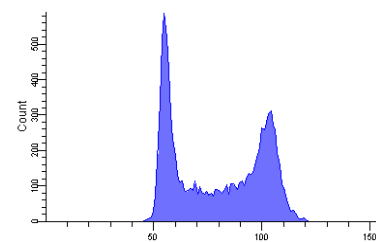

12 h

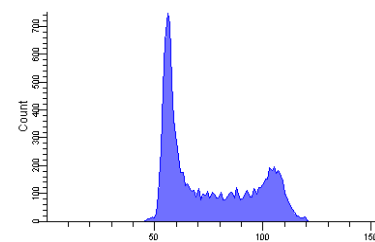

24 h

**C**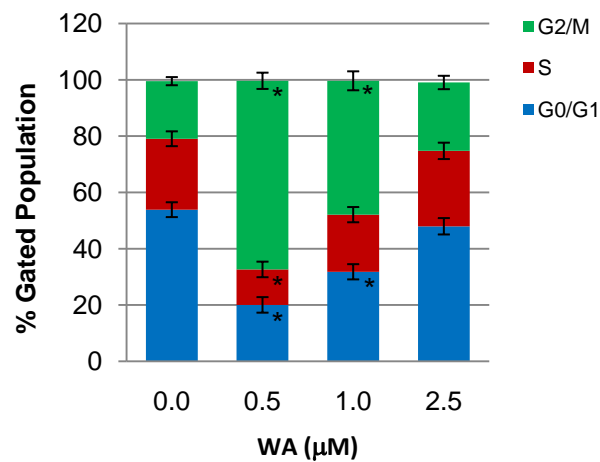**D**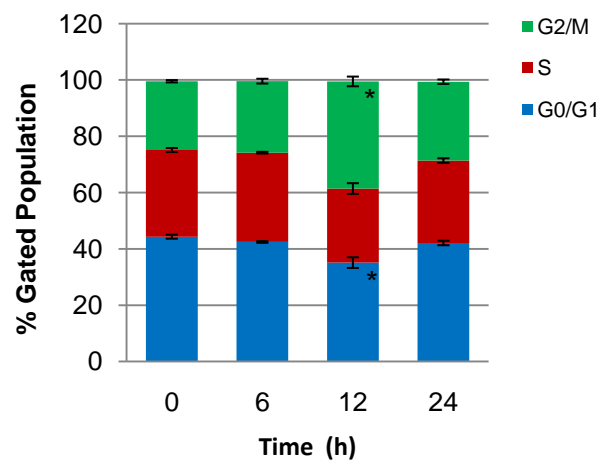

Supplement: MOESM3 [file 9519794]
